# Supplementary material for: Variability in iron, zinc and phytic acid content in a worldwide collection of commercial durum wheat cultivars and the effect of reduced irrigation on these traits
Source: PubMed Central journal article supplement (PMC5544597; doi:10.1016/j.foodchem.2017.05.110), 2017-12-15
Supplement: mmc1.pdf [file mmc1.pdf]

**Electronic Supplementary Table 1.** Grain yield and grain quality data of 46 durum wheat cvs. grown under full irrigation (A) and under reduced irrigation (B).

**A: Full irrigation**

| Entry | Country of origin | Cv.                        | Grain Yield (t/ha) | Test Weight (TW) kg/Hl | Thousand Kernel Weight (TKW) g | Grain Protein (GPRO) 12.5%MB | Iron Content (FeC) mg/Kg | Zinc Content (ZnC) mg/Kg | Phytic Acid (%) | Molar Ratio Phy:Fe | Molar Ratio Phy:Zn |
|-------|-------------------|----------------------------|--------------------|------------------------|--------------------------------|------------------------------|--------------------------|--------------------------|-----------------|--------------------|--------------------|
| 1     | ALGERIA           | <b>KHROUB 76</b>           | 4,5                | 80,4                   | 47,4                           | 13,7                         | 28,6                     | 41,4                     | 0,83            | 24,4               | 20,4               |
| 2     | ALGERIA           | <b>WAHA</b>                | 5,3                | 82,4                   | 43,4                           | 13,9                         | 30,1                     | 39,0                     | 0,74            | 20,7               | 18,8               |
| 3     | ARGENTINA         | <b>BONAERENSE VALVERDE</b> | 5,3                | 83,1                   | 39,1                           | 11,9                         | 27,8                     | 36,1                     | 0,68            | 21,0               | 18,8               |
| 4     | ARGENTINA         | <b>BUCK CANDISUR</b>       | 3,8                | 81,6                   | 53,4                           | 13,7                         | 32,8                     | 40,2                     | 0,83            | 21,7               | 20,7               |
| 5     | AUSTRALIA         | <b>BELLAROI</b>            | 4,4                | 79,8                   | 48,8                           | 15,4                         | 31,7                     | 43,0                     | 0,86            | 22,8               | 19,8               |
| 6     | AUSTRALIA         | <b>HYPERNO</b>             | 5,0                | 81,5                   | 41,1                           | 12,0                         | 30,5                     | 34,8                     | 0,69            | 18,9               | 19,7               |
| 7     | AUSTRALIA         | <b>JANDAROI</b>            | 5,2                | 81,1                   | 48,4                           | 14,2                         | 28,3                     | 38,0                     | 0,76            | 23,6               | 20,3               |
| 8     | CHILE             | <b>GUAYACAN INIA</b>       | 5,3                | 83,2                   | 54,6                           | 12,4                         | 31,7                     | 36,1                     | 0,74            | 19,6               | 20,3               |
| 9     | SPAIN             | <b>AVISPA</b>              | 5,1                | 82,0                   | 41,8                           | 12,5                         | 27,9                     | 33,3                     | 0,75            | 22,5               | 22,3               |
| 10    | FRANCE            | <b>EXELDUR</b>             | 2,8                | 74,5                   | 31,6                           | 15,4                         | 28,1                     | 43,8                     | 0,94            | 29,6               | 21,3               |
| 11    | INDIA             | <b>HD 4530</b>             | 5,0                | 79,9                   | 39,5                           | 12,6                         | 32,0                     | 36,0                     | 0,70            | 18,6               | 19,9               |
| 12    | INDIA             | <b>MALAVIKA</b>            | 5,0                | 82,9                   | 45,8                           | 11,8                         | 30,3                     | 35,6                     | 0,65            | 18,5               | 18,4               |
| 13    | INDIA             | <b>RAJ 1555</b>            | 4,9                | 80,5                   | 49,5                           | 12,0                         | 30,8                     | 33,9                     | 0,71            | 19,7               | 20,7               |
| 14    | INDIA             | <b>WH 896</b>              | 5,4                | 82,8                   | 45,3                           | 12,0                         | 29,5                     | 33,6                     | 0,66            | 18,5               | 19,4               |
| 15    | ITALIA            | <b>BRONTE</b>              | 5,5                | 81,6                   | 52,2                           | 13,4                         | 35,3                     | 39,6                     | 0,71            | 16,8               | 18,5               |
| 16    | ITALIA            | <b>CRECALE</b>             | 4,6                | 79,9                   | 37,0                           | 13,2                         | 28,5                     | 38,9                     | 0,78            | 23,1               | 20,1               |
| 17    | ITALIA            | <b>DULLIO</b>              | 5,9                | 83,2                   | 50,5                           | 12,8                         | 30,8                     | 39,0                     | 0,69            | 18,6               | 17,4               |
| 18    | ITALIA            | <b>IRIDE</b>               | 4,4                | 81,3                   | 38,9                           | 12,3                         | 25,7                     | 33,7                     | 0,76            | 25,5               | 23,6               |
| 19    | ITALIA            | <b>KARALIS</b>             | 4,9                | 80,9                   | 48,1                           | 13,5                         | 35,3                     | 45,2                     | 0,79            | 19,1               | 17,9               |
| 20    | ITALIA            | <b>NORMANO</b>             | 4,8                | 78,5                   | 41,7                           | 15,8                         | 35,0                     | 48,8                     | 0,88            | 20,9               | 17,9               |
| 21    | ITALIA            | <b>SARAGOLLA</b>           | 5,6                | 82,6                   | 45,3                           | 12,4                         | 32,2                     | 38,1                     | 0,75            | 19,8               | 19,7               |
| 22    | ITALIA            | <b>SVEVO</b>               | 5,2                | 81,9                   | 44,1                           | 14,1                         | 30,9                     | 38,1                     | 0,75            | 20,4               | 19,7               |
| 23    | MEXICO            | <b>ACONCHI 89</b>          | 4,8                | 84,0                   | 46,4                           | 12,4                         | 29,1                     | 37,0                     | 0,75            | 22,3               | 21,0               |
| 24    | MEXICO            | <b>ALTAR 84</b>            | 5,3                | 84,0                   | 44,0                           | 11,9                         | 31,7                     | 34,9                     | 0,66            | 17,5               | 19,8               |
| 25    | MEXICO            | <b>CEMEXI C 2008</b>       | 5,8                | 83,5                   | 42,6                           | 12,6                         | 29,4                     | 34,6                     | 0,70            | 19,9               | 20,0               |

|    |                |                          |     |      |      |      |      |      |      |      |      |
|----|----------------|--------------------------|-----|------|------|------|------|------|------|------|------|
| 26 | MEXICO         | <b>NACORI C 97</b>       | 5,9 | 82,9 | 44,7 | 12,9 | 32,0 | 32,8 | 0,67 | 17,6 | 20,5 |
| 27 | MEXICO         | <b>RAFI C 97</b>         | 5,4 | 83,7 | 37,3 | 11,7 | 26,3 | 31,8 | 0,68 | 22,7 | 22,7 |
| 28 | MEXICO         | <b>RIO COLORADO</b>      | 5,6 | 79,7 | 41,3 | 11,9 | 31,7 | 33,1 | 0,67 | 18,0 | 20,4 |
| 29 | MEXICO         | <b>SOOTY_9/RASCON_37</b> | 5,5 | 82,5 | 44,4 | 11,3 | 31,6 | 33,2 | 0,66 | 18,1 | 19,9 |
| 30 | MOROCCO        | <b>AMRIA</b>             | 5,3 | 82,6 | 51,6 | 14,1 | 32,7 | 37,4 | 0,82 | 21,0 | 21,9 |
| 31 | MOROCCO        | <b>MARZAK</b>            | 5,5 | 81,6 | 47,5 | 13,8 | 35,9 | 42,1 | 0,83 | 19,4 | 20,0 |
| 32 | MOROCCO        | <b>NASSIRA</b>           | 5,3 | 80,4 | 43,8 | 13,2 | 31,2 | 36,6 | 0,74 | 20,6 | 20,9 |
| 33 | MOROCCO        | <b>TOMOUH</b>            | 4,4 | 81,1 | 39,6 | 13,9 | 28,6 | 34,0 | 0,76 | 22,4 | 22,0 |
| 34 | SPAIN          | <b>CALERO</b>            | 5,4 | 81,6 | 39,3 | 11,9 | 30,0 | 35,7 | 0,73 | 21,0 | 20,5 |
| 35 | SPAIN          | <b>CARPIO</b>            | 5,4 | 82,5 | 42,8 | 12,3 | 33,5 | 38,5 | 0,79 | 19,6 | 20,3 |
| 36 | SPAIN          | <b>DON JAIME</b>         | 4,7 | 83,1 | 49,0 | 14,4 | 39,1 | 36,8 | 0,75 | 16,3 | 20,4 |
| 37 | SPAIN          | <b>DON PATRICIO</b>      | 5,8 | 82,2 | 45,3 | 12,2 | 33,0 | 36,5 | 0,77 | 19,9 | 20,7 |
| 38 | SPAIN          | <b>DON SEBASTIAN</b>     | 5,2 | 83,8 | 54,6 | 13,8 | 36,7 | 38,2 | 0,74 | 16,8 | 18,9 |
| 39 | TUNISIA        | <b>KARIM 80</b>          | 5,2 | 82,2 | 45,7 | 12,4 | 30,5 | 35,2 | 0,73 | 20,3 | 21,0 |
| 40 | TUNISIA        | <b>MÂALI</b>             | 6,1 | 83,4 | 57,7 | 12,0 | 32,8 | 35,7 | 0,73 | 19,0 | 20,2 |
| 41 | TUNISIA        | <b>NASR 99</b>           | 4,8 | 81,5 | 42,7 | 12,5 | 32,0 | 35,5 | 0,71 | 18,7 | 19,8 |
| 42 | TUNISIA        | <b>RAZZAK 87</b>         | 4,8 | 82,4 | 46,6 | 12,4 | 31,2 | 34,5 | 0,73 | 19,5 | 21,0 |
| 43 | USA-CALIFORNIA | <b>DESERT KING</b>       | 4,4 | 75,7 | 32,9 | 13,0 | 29,7 | 38,5 | 0,84 | 23,6 | 20,7 |
| 44 | USA-CALIFORNIA | <b>KRONOS</b>            | 4,8 | 80,4 | 53,9 | 13,5 | 31,9 | 37,7 | 0,80 | 21,1 | 21,1 |
| 45 | USA-CALIFORNIA | <b>MOHAWK</b>            | 4,1 | 80,8 | 53,7 | 12,7 | 31,5 | 36,7 | 0,71 | 19,3 | 19,8 |
| 46 | USA-CALIFORNIA | <b>UC1113</b>            | 5,5 | 81,9 | 42,5 | 13,0 | 33,4 | 37,1 | 0,77 | 19,5 | 20,7 |

## B: Reduced irrigation

| Entry | Country of origin | Cross                      | Grain Yield (t/ha) | Test Weight (TW) kg/Hl | Thousand Kernel Weight (TKW) g | Grain Protein (GPRO) 12.5%MB | Iron Content (FeC) mg/Kg | Zinc Content (ZnC) mg/Kg | Phytic Acid (%) | Molar Ratio Phy:Fe | Molar Ratio Phy:Zn |
|-------|-------------------|----------------------------|--------------------|------------------------|--------------------------------|------------------------------|--------------------------|--------------------------|-----------------|--------------------|--------------------|
| 1     | ALGERIA           | <b>KHROUB 76</b>           | 2,3                | 82,6                   | 50,6                           | 15,2                         | 34,6                     | 32,7                     | 0,68            | 16,4               | 21,0               |
| 2     | ALGERIA           | <b>WAHA</b>                | 2,9                | 82,6                   | 40,6                           | 14,4                         | 31,8                     | 28,4                     | 0,64            | 17,1               | 22,1               |
| 3     | ARGENTINA         | <b>BONAERENSE VALVERDE</b> | 2,7                | 83,2                   | 39,2                           | 13,6                         | 33,4                     | 34,0                     | 0,67            | 17,0               | 19,6               |
| 4     | ARGENTINA         | <b>BUCK CANDISUR</b>       | 2,8                | 82,9                   | 52,0                           | 13,8                         | 32,4                     | 30,5                     | 0,64            | 17,2               | 20,4               |
| 5     | AUSTRALIA         | <b>BELLAROI</b>            | 1,5                | 79,9                   | 48,2                           | 18,2                         | 40,5                     | 43,0                     | 0,92            | 19,7               | 21,9               |
| 6     | AUSTRALIA         | <b>HYPERNO</b>             | 3,1                | 82,6                   | 43,1                           | 13,3                         | 35,7                     | 28,6                     | 0,60            | 14,2               | 20,6               |
| 7     | AUSTRALIA         | <b>JANDAROI</b>            | 2,8                | 82,0                   | 43,0                           | 14,9                         | 34,4                     | 30,8                     | 0,69            | 17,2               | 21,4               |
| 8     | CHILE             | <b>GUAYACAN INIA</b>       | 2,4                | 83,1                   | 48,3                           | 13,8                         | 33,4                     | 31,3                     | 0,63            | 16,1               | 19,6               |
| 9     | SPAIN             | <b>AVISPA</b>              | 2,8                | 83,6                   | 42,2                           | 13,3                         | 33,0                     | 29,1                     | 0,60            | 15,5               | 20,1               |
| 10    | FRANCE            | <b>EXELDUR</b>             | 1,1                | 78,9                   | 36,4                           | 17,3                         | 35,7                     | 44,7                     | 0,84            | 20,4               | 18,7               |
| 11    | INDIA             | <b>HD 4530</b>             | 2,5                | 80,1                   | 39,6                           | 14,6                         | 32,9                     | 30,2                     | 0,52            | 13,5               | 17,0               |
| 12    | INDIA             | <b>MALAVIKA</b>            | 2,5                | 82,9                   | 43,9                           | 12,9                         | 31,9                     | 29,0                     | 0,55            | 14,6               | 19,4               |
| 13    | INDIA             | <b>RAJ 1555</b>            | 2,4                | 82,4                   | 51,5                           | 12,8                         | 31,2                     | 26,6                     | 0,51            | 13,6               | 19,0               |
| 14    | INDIA             | <b>WH 896</b>              | 2,6                | 83,5                   | 45,3                           | 13,1                         | 32,3                     | 32,1                     | 0,56            | 14,8               | 17,1               |
| 15    | ITALIA            | <b>BRONTE</b>              | 2,7                | 81,5                   | 50,8                           | 14,1                         | 34,8                     | 30,6                     | 0,62            | 15,3               | 19,1               |
| 16    | ITALIA            | <b>CRECALE</b>             | 2,4                | 79,6                   | 34,5                           | 14,2                         | 32,4                     | 30,9                     | 0,63            | 16,8               | 20,3               |
| 17    | ITALIA            | <b>DULLIO</b>              | 2,7                | 82,1                   | 48,3                           | 13,4                         | 33,3                     | 30,4                     | 0,59            | 15,7               | 19,5               |
| 18    | ITALIA            | <b>IRIDE</b>               | 2,7                | 82,7                   | 39,4                           | 13,5                         | 33,2                     | 29,1                     | 0,58            | 14,9               | 19,1               |
| 19    | ITALIA            | <b>KARALIS</b>             | 2,5                | 82,3                   | 46,4                           | 14,6                         | 35,3                     | 35,2                     | 0,68            | 16,4               | 18,9               |
| 20    | ITALIA            | <b>NORMANO</b>             | 1,8                | 82,0                   | 44,3                           | 18,0                         | 38,5                     | 37,2                     | 0,79            | 17,2               | 20,7               |
| 21    | ITALIA            | <b>SARAGOLLA</b>           | 2,7                | 79,8                   | 43,2                           | 13,4                         | 33,8                     | 29,2                     | 0,62            | 15,6               | 21,1               |
| 22    | ITALIA            | <b>SVEVO</b>               | 2,7                | 82,4                   | 40,9                           | 15,7                         | 35,2                     | 32,9                     | 0,65            | 15,9               | 19,5               |
| 23    | MEXICO            | <b>ACONCHI 89</b>          | 2,5                | 83,6                   | 41,3                           | 13,7                         | 33,8                     | 28,2                     | 0,60            | 15,0               | 20,7               |
| 24    | MEXICO            | <b>ALTAR 84</b>            | 2,6                | 84,1                   | 40,4                           | 13,0                         | 33,1                     | 24,8                     | 0,49            | 12,7               | 19,8               |
| 25    | MEXICO            | <b>CEMEXI C 2008</b>       | 2,7                | 83,2                   | 43,1                           | 13,7                         | 32                       | 29,0                     | 0,54            | 14,3               | 18,6               |
| 26    | MEXICO            | <b>NACORI C 97</b>         | 2,8                | 83,2                   | 44,7                           | 13,9                         | 34,0                     | 30,2                     | 0,51            | 12,5               | 16,9               |
| 27    | MEXICO            | <b>RAFI C 97</b>           | 2,5                | 83,1                   | 38,0                           | 13,6                         | 32,7                     | 30,6                     | 0,57            | 14,8               | 18,4               |
| 28    | MEXICO            | <b>RIO COLORADO</b>        | 2,7                | 81,3                   | 48,1                           | 14,1                         | 33,1                     | 29,8                     | 0,59            | 15,2               | 19,5               |

|    |                |                          |     |      |      |      |      |      |      |      |      |
|----|----------------|--------------------------|-----|------|------|------|------|------|------|------|------|
| 29 | MEXICO         | <b>SOOTY_9/RASCON_37</b> | 2,6 | 83,2 | 45,6 | 14,2 | 32,6 | 28,7 | 0,53 | 13,6 | 18,6 |
| 30 | MOROCCO        | <b>AMRIA</b>             | 2,6 | 83,3 | 46,0 | 14,9 | 34,1 | 29,2 | 0,62 | 15,5 | 20,5 |
| 31 | MOROCCO        | <b>MARZAK</b>            | 2,5 | 82,7 | 46,2 | 15,0 | 35,5 | 31,4 | 0,63 | 15,2 | 19,1 |
| 32 | MOROCCO        | <b>NASSIRA</b>           | 2,5 | 79,9 | 43,3 | 14,7 | 32,6 | 30,4 | 0,57 | 14,9 | 18,4 |
| 33 | MOROCCO        | <b>TOMOUH</b>            | 2,7 | 81,5 | 42,0 | 14,5 | 30,2 | 27,5 | 0,55 | 15,3 | 20,3 |
| 34 | SPAIN          | <b>CALERO</b>            | 2,2 | 81,5 | 34,1 | 13,3 | 30,3 | 28,0 | 0,49 | 13,6 | 18,2 |
| 35 | SPAIN          | <b>CARPIO</b>            | 2,8 | 83,2 | 43,2 | 14,0 | 35,4 | 33,4 | 0,62 | 14,7 | 17,1 |
| 36 | SPAIN          | <b>DON JAIME</b>         | 2,6 | 82,8 | 42,6 | 13,1 | 33,9 | 27,9 | 0,48 | 12,1 | 16,9 |
| 37 | SPAIN          | <b>DON PATRICIO</b>      | 2,9 | 82,7 | 41,8 | 13,5 | 32,8 | 31,9 | 0,56 | 14,4 | 17,4 |
| 38 | SPAIN          | <b>DON SEBASTIAN</b>     | 2,8 | 83,4 | 53,3 | 14,6 | 34,9 | 32,1 | 0,57 | 13,8 | 17,4 |
| 39 | TUNISIA        | <b>KARIM 80</b>          | 2,4 | 82,2 | 45,7 | 13,6 | 32,7 | 30,0 | 0,60 | 15,5 | 19,4 |
| 40 | TUNISIA        | <b>MÂALI</b>             | 3,2 | 84,4 | 53,1 | 13,0 | 33,9 | 28,9 | 0,54 | 13,5 | 18,2 |
| 41 | TUNISIA        | <b>NASR 99</b>           | 2,6 | 82,9 | 43,6 | 13,3 | 31,0 | 25,7 | 0,50 | 14,1 | 19,9 |
| 42 | TUNISIA        | <b>RAZZAK 87</b>         | 2,8 | 83,3 | 51,9 | 13,9 | 34,0 | 30,5 | 0,59 | 14,6 | 18,8 |
| 43 | USA-CALIFORNIA | <b>DESERT KING</b>       | 1,9 | 80,0 | 40,7 | 16,2 | 34,5 | 37,1 | 0,66 | 15,9 | 17,3 |
| 44 | USA-CALIFORNIA | <b>KRONOS</b>            | 2,6 | 80,9 | 51,7 | 14,4 | 33,1 | 32,2 | 0,60 | 15,6 | 19,3 |
| 45 | USA-CALIFORNIA | <b>MOHAWK</b>            | 2,6 | 80,1 | 47,0 | 14,0 | 32,5 | 30,6 | 0,59 | 15,2 | 18,8 |
| 46 | USA-CALIFORNIA | <b>UC1113</b>            | 3,0 | 82,0 | 40,8 | 13,8 | 33,4 | 30,0 | 0,58 | 14,7 | 19,0 |
